# Supplementary material for: Multiple Comparisons Using Composite Likelihood in Clustered Data
Source: publisher site journal article supplement (doi:10.1515/ijb-2016-0004)
Supplement: Supplementary file 1 [file supplementary_18.pdf › supplementary_18.pdf]

## 1 Simulation result on all pairwise comparisons

In Section 4 of the main manuscript, we provide simulation results under various settings for many-to-one comparisons. We investigate many methods including MNQ, MNQ naive, Bonferroni, Dunn-Sidak, Holm and Schéffe. In the manuscript, only MNQ, MNQ naive, and Bonferroni are reported. In this supplementary file, we report the result for all six methods in Table 1-4.

We also provide additional simulations for all pairwise comparisons. We simulate multivariate normal, multivariate probit and quadratic exponential models as described in Section 4 of the paper. The global null hypothesis, sample size and the two alternative configurations are the same as those used in many-to-one comparisons. We perform all pairwise comparisons with  $m = 4$  and  $p = 10$ . For the multivariate normal, multivariate probit, and quadratic exponential models, we consider  $\rho = 0$ , or  $0.5$ . For the quadratic exponential, we consider  $w = 0, 0.5$ . The results are summarized in Table 5. We again observe that the MNQ approach has the best performance. MNQ maintains good control of the FWER except for the case of quadratic exponential model with  $\rho = 0.5$ , where it is slightly above  $0.05$ . The naive MNQ either has either very large FWER or very small FWER, indicating its poor control of the error rate. Among all the methods which maintain good control of FWER, the MNQ method achieves the highest power. In addition, we consider the Tukey approach, as it is a commonly used testing procedure in all pairwise comparisons.

Table 1: Simulations results for multivariate normal with exchangeable  $\Sigma$

|           | $\rho$ | $m$ | $p$ | MNQ    | naive  | Bonf   | S-D    | Holm   | Scheffé |
|-----------|--------|-----|-----|--------|--------|--------|--------|--------|---------|
| FWER      |        |     |     | 0.0545 | 0.0553 | 0.0419 | 0.0427 | 0.0419 | 0.0007  |
| $a_1$     |        |     | 10  | 0.8164 | 0.8166 | 0.7894 | 0.7918 | 0.7894 | 0.2801  |
| $a_2$     |        |     |     | 0.8057 | 0.8053 | 0.7617 | 0.7738 | 0.7617 | 0.2226  |
| ind $a_2$ |        |     |     | 0.1816 | 0.1816 | 0.1683 | 0.1701 | 0.1770 | 0.0448  |
| FWER      |        |     |     | 0.0511 | 0.0502 | 0.0352 | 0.0363 | 0.0352 | 0.0000  |
| $a_1$     |        |     | 20  | 0.7487 | 0.7476 | 0.7062 | 0.7086 | 0.7062 | 0.0259  |
| $a_2$     |        |     |     | 0.7150 | 0.7134 | 0.6687 | 0.6628 | 0.6687 | 0.0162  |
| ind $a_2$ |        |     |     | 0.1540 | 0.1535 | 0.1416 | 0.1401 | 0.1504 | 0.0032  |
| FWER      |        |     |     | 0.0479 | 0.0471 | 0.0375 | 0.0378 | 0.0375 | 0.0001  |
| $a_1$     |        |     | 10  | 0.9983 | 0.9983 | 0.9979 | 0.9980 | 0.9979 | 0.9284  |
| $a_2$     |        |     |     | 0.9993 | 0.9993 | 0.9986 | 0.9990 | 0.9986 | 0.8792  |
| ind $a_2$ |        |     |     | 0.2964 | 0.2963 | 0.2844 | 0.2857 | 0.2979 | 0.1787  |
| FWER      |        |     |     | 0.0487 | 0.0485 | 0.0363 | 0.0373 | 0.0363 | 0.0000  |
| $a_1$     |        |     | 20  | 0.9981 | 0.9980 | 0.9967 | 0.9969 | 0.9967 | 0.5428  |
| $a_2$     |        |     |     | 0.9978 | 0.9977 | 0.9963 | 0.9957 | 0.9963 | 0.4137  |
| ind $a_2$ |        |     |     | 0.2688 | 0.2681 | 0.2552 | 0.2555 | 0.2653 | 0.0828  |
| FWER      |        |     |     | 0.0513 | 0.0977 | 0.0390 | 0.0398 | 0.0390 | 0.0007  |
| $a_1$     |        |     | 10  | 0.7235 | 0.8129 | 0.6867 | 0.6904 | 0.6867 | 0.1947  |
| $a_2$     |        |     |     | 0.6922 | 0.8042 | 0.6615 | 0.6571 | 0.6615 | 0.1497  |
| ind $a_2$ |        |     |     | 0.1514 | 0.1878 | 0.1442 | 0.1415 | 0.1507 | 0.0300  |
| FWER      |        |     |     | 0.0510 | 0.1029 | 0.0377 | 0.0385 | 0.0377 | 0.0000  |
| $a_1$     |        |     | 20  | 0.6420 | 0.7526 | 0.5950 | 0.5985 | 0.5950 | 0.0140  |
| $a_2$     |        |     |     | 0.6031 | 0.7322 | 0.5437 | 0.5508 | 0.5437 | 0.0076  |
| ind $a_2$ |        |     |     | 0.1274 | 0.1607 | 0.1135 | 0.1150 | 0.1222 | 0.0015  |
| FWER      |        |     |     | 0.0520 | 0.2079 | 0.0410 | 0.0417 | 0.0410 | 0.0000  |
| $a_1$     |        |     | 10  | 0.9570 | 0.9936 | 0.9466 | 0.9469 | 0.9466 | 0.6125  |
| $a_2$     |        |     |     | 0.9555 | 0.9982 | 0.9438 | 0.9431 | 0.9438 | 0.5062  |
| ind $a_2$ |        |     |     | 0.2383 | 0.3381 | 0.2273 | 0.2274 | 0.2375 | 0.1019  |
| FWER      |        |     |     | 0.0459 | 0.2271 | 0.0328 | 0.0337 | 0.0328 | 0.0000  |
| $a_1$     |        |     | 20  | 0.9403 | 0.9938 | 0.9224 | 0.9243 | 0.9224 | 0.1408  |
| $a_2$     |        |     |     | 0.9222 | 0.9948 | 0.8932 | 0.8968 | 0.8932 | 0.0871  |
| ind $a_2$ |        |     |     | 0.2118 | 0.3072 | 0.1981 | 0.1997 | 0.2061 | 0.0174  |

## 2 A skewed distribution example

Here, we consider a multivariate gamma distribution which has marginal univariate gamma distribution and a covariance structure. To generate a multivariate gamma model, let  $g_1$  be  $m \times 1$  independent vectors from a gamma distribution with shape parameters  $\gamma_1$ , a positive vector of dimension  $m$ . Define  $G = Kg_1$ , where  $K$  is a full rank matrix

Table 2: Simulations results for multivariate normal with unstructured  $\Sigma$  (many-to-one)

|           | $m$ | $p$ | MNQ    | naive  | Bonf   | S-D    | Holm   | Scheffé |
|-----------|-----|-----|--------|--------|--------|--------|--------|---------|
| FWER      |     |     | 0.0464 | 0.0729 | 0.0345 | 0.0358 | 0.0345 | 0.0004  |
| $a_1$     |     | 10  | 0.6348 | 0.7089 | 0.5962 | 0.5992 | 0.5962 | 0.1358  |
| $a_2$     |     |     | 0.5123 | 0.6045 | 0.4763 | 0.4714 | 0.4763 | 0.0614  |
| ind $a_2$ |     | 4   | 0.1100 | 0.1341 | 0.1019 | 0.1022 | 0.1071 | 0.0123  |
| FWER      |     |     | 0.0390 | 0.0664 | 0.0285 | 0.0290 | 0.0285 | 0.0000  |
| $a_1$     |     | 20  | 0.5205 | 0.6081 | 0.4694 | 0.4736 | 0.4694 | 0.0046  |
| $a_2$     |     |     | 0.3913 | 0.4864 | 0.3378 | 0.3428 | 0.3378 | 0.0011  |
| ind $a_2$ |     |     | 0.0811 | 0.1018 | 0.0687 | 0.0702 | 0.0749 | 0.0002  |
| FWER      |     |     | 0.0472 | 0.0407 | 0.0360 | 0.0367 | 0.0360 | 0.0004  |
| $a_1$     |     | 10  | 0.6310 | 0.6102 | 0.5906 | 0.5940 | 0.5906 | 0.1198  |
| $a_2$     |     |     | 0.5025 | 0.4779 | 0.4560 | 0.4599 | 0.4560 | 0.0537  |
| ind $a_2$ |     | 10  | 0.1088 | 0.1028 | 0.0974 | 0.0982 | 0.1032 | 0.0107  |
| FWER      |     |     | 0.0361 | 0.0302 | 0.0262 | 0.0267 | 0.0262 | 0.0000  |
| $a_1$     |     | 20  | 0.5078 | 0.4865 | 0.4585 | 0.4615 | 0.4585 | 0.0025  |
| $a_2$     |     |     | 0.3668 | 0.3448 | 0.3148 | 0.3167 | 0.3148 | 0.0010  |
| ind $a_2$ |     |     | 0.0742 | 0.0698 | 0.0637 | 0.0641 | 0.0692 | 0.0002  |

called the incidence matrix with all entries equal to either zero or one that follows certain properties ( Ronning, 1977). Then  $G$  has a multivariate gamma distribution with shape parameter  $\alpha = K\gamma_1$  and covariance matrix  $\Sigma = K\Gamma_1K^T$ , where the (diagonal) matrix  $\Gamma_1$  is the variance matrix of  $g_1$ .

Given  $n$  independent multivariate gamma vectors  $Y = (y_1, y_2, \dots, y_n)^T$ , with  $y_i = (y_{i1}, \dots, y_{im})^T$ . The univariate composite loglikelihood function can be formulated as

$$cl(\beta; Y) = \sum_{i=1}^n \sum_{j=1}^m \left( -\frac{vy_{ij}}{\mu_{ij}} - v \log \mu_{ij} + v \log v + (v-1) \log y_{ij} - \log \Gamma(v) \right),$$

where  $\mu_{ij} = E(y_{ij})$ ,  $v$  is the shape parameter, and  $\mu_{ij}/v$  is the scale parameter. We used the log link to define the mean parameter:  $\mu_{ij} =$

Table 3: Simulation results for the probit model (many-to-one)

|           | $\rho$ | $m$ | $p$ | MNQ    | naive  | Bonf   | S-D    | Holm   | Scheffé |
|-----------|--------|-----|-----|--------|--------|--------|--------|--------|---------|
| FWER      |        |     |     | 0.0530 | 0.0506 | 0.0413 | 0.0424 | 0.0413 | 0.0001  |
| $a_1$     |        |     | 10  | 0.8700 | 0.8705 | 0.8477 | 0.8496 | 0.8477 | 0.3420  |
| $a_2$     |        |     |     | 0.9114 | 0.9109 | 0.8885 | 0.8907 | 0.8885 | 0.3572  |
| ind $a_2$ |        | 4   |     | 0.2166 | 0.2156 | 0.2039 | 0.2061 | 0.2136 | 0.0718  |
| FWER      |        |     |     | 0.0528 | 0.0503 | 0.0389 | 0.0395 | 0.0389 | 0.0000  |
| $a_1$     |        |     | 20  | 0.8258 | 0.8232 | 0.7902 | 0.7924 | 0.7902 | 0.0460  |
| $a_2$     |        |     |     | 0.8547 | 0.8511 | 0.8149 | 0.8159 | 0.8149 | 0.0410  |
| ind $a_2$ |        | 0   |     | 0.1887 | 0.1878 | 0.1769 | 0.1765 | 0.1862 | 0.0082  |
| FWER      |        |     |     | 0.0526 | 0.0515 | 0.0423 | 0.0428 | 0.0423 | 0.0005  |
| $a_1$     |        |     | 10  | 0.9996 | 0.9996 | 0.9995 | 0.9995 | 0.9995 | 0.9641  |
| $a_2$     |        |     |     | 1.0000 | 1.0000 | 1.0000 | 1.0000 | 1.0000 | 0.9695  |
| ind $a_2$ |        | 10  |     | 0.3330 | 0.3319 | 0.3168 | 0.3188 | 0.3332 | 0.2005  |
| FWER      |        |     |     | 0.0527 | 0.0508 | 0.0364 | 0.0375 | 0.0364 | 0.0000  |
| $a_1$     |        |     | 20  | 0.9993 | 0.9995 | 0.9985 | 0.9985 | 0.9985 | 0.6596  |
| $a_2$     |        |     |     | 1.0000 | 0.9999 | 0.9997 | 0.9997 | 0.9997 | 0.6603  |
| ind $a_2$ |        |     |     | 0.2973 | 0.2956 | 0.2811 | 0.2812 | 0.2925 | 0.1321  |
| FWER      |        |     |     | 0.0508 | 0.0793 | 0.0393 | 0.0404 | 0.0393 | 0.0003  |
| $a_1$     |        |     | 10  | 0.8102 | 0.8601 | 0.7808 | 0.7841 | 0.7808 | 0.2726  |
| $a_2$     |        |     |     | 0.8530 | 0.9038 | 0.8305 | 0.8258 | 0.8305 | 0.2689  |
| ind $a_2$ |        | 4   |     | 0.1970 | 0.2206 | 0.1864 | 0.1867 | 0.1954 | 0.0542  |
| FWER      |        |     |     | 0.0585 | 0.0915 | 0.0406 | 0.0415 | 0.0406 | 0.0000  |
| $a_1$     |        |     | 20  | 0.7578 | 0.8196 | 0.7082 | 0.7106 | 0.7082 | 0.0264  |
| $a_2$     |        |     |     | 0.7891 | 0.8534 | 0.7365 | 0.7428 | 0.7365 | 0.0247  |
| ind $a_2$ |        | 0.5 |     | 0.1727 | 0.1942 | 0.1571 | 0.1593 | 0.1666 | 0.0049  |
| FWER      |        |     |     | 0.0513 | 0.1437 | 0.0402 | 0.0412 | 0.0402 | 0.0005  |
| $a_1$     |        |     | 10  | 0.9900 | 0.9979 | 0.9871 | 0.9876 | 0.9871 | 0.8017  |
| $a_2$     |        |     |     | 0.9952 | 0.9997 | 0.9966 | 0.9939 | 0.9966 | 0.8038  |
| ind $a_2$ |        | 10  |     | 0.2815 | 0.3585 | 0.2704 | 0.2710 | 0.2831 | 0.1629  |
| FWER      |        |     |     | 0.0543 | 0.1622 | 0.0382 | 0.0389 | 0.0382 | 0.0000  |
| $a_1$     |        |     | 20  | 0.9862 | 0.9974 | 0.9784 | 0.9787 | 0.9784 | 0.3081  |
| $a_2$     |        |     |     | 0.9935 | 0.9998 | 0.9894 | 0.9883 | 0.9894 | 0.3006  |
| ind $a_2$ |        |     |     | 0.2575 | 0.3250 | 0.2450 | 0.2444 | 0.2555 | 0.0601  |

$\exp\{\vec{x}_{ij}\beta\}$ . Denote  $\mu_i = (\mu_{i1}, \dots, \mu_{im})^T$ . Under this set up, we have

$$cl^{(1)}(\beta; Y) = \sum_{i=1}^n \left( \frac{\partial \mu_i}{\partial \beta} \right)^T V(\mu)_i^{-1} (y_i - \mu_i),$$

Table 4: Simulation results for the quadratic exponential model (many-to-one)

|           | $w$ | $m$ | $p$ | MNQ    | naive  | Bonf   | S-D    | Holm   | Scheffé |
|-----------|-----|-----|-----|--------|--------|--------|--------|--------|---------|
| FWER      |     |     |     | 0.0514 | 0.0562 | 0.0400 | 0.0403 | 0.0400 | 0.0001  |
| $a_1$     |     |     | 10  | 0.5390 | 0.5534 | 0.5010 | 0.5046 | 0.5010 | 0.0777  |
| $a_2$     |     |     |     | 0.7067 | 0.7240 | 0.6573 | 0.6636 | 0.6573 | 0.0935  |
| ind $a_2$ |     | 4   |     | 0.1956 | 0.2057 | 0.1765 | 0.1778 | 0.1875 | 0.0197  |
| FWER      |     |     |     | 0.0561 | 0.0767 | 0.0404 | 0.0412 | 0.0404 | 0.0000  |
| $a_1$     |     |     | 20  | 0.4551 | 0.4853 | 0.3990 | 0.4021 | 0.3990 | 0.0025  |
| $a_2$     |     |     |     | 0.6040 | 0.6365 | 0.5237 | 0.5403 | 0.5237 | 0.0027  |
| ind $a_2$ |     | 0   |     | 0.1546 | 0.1669 | 0.1303 | 0.1336 | 0.1406 | 0.0005  |
| FWER      |     |     |     | 0.0491 | 0.0549 | 0.0381 | 0.0384 | 0.0381 | 0.0001  |
| $a_1$     |     |     | 10  | 0.5391 | 0.5535 | 0.5010 | 0.5046 | 0.5010 | 0.0779  |
| $a_2$     |     |     |     | 0.7066 | 0.7239 | 0.6573 | 0.6636 | 0.6573 | 0.0934  |
| ind $a_2$ |     | 10  |     | 0.1956 | 0.2057 | 0.1765 | 0.1778 | 0.1875 | 0.0197  |
| FWER      |     |     |     | 0.0561 | 0.0767 | 0.0404 | 0.0412 | 0.0404 | 0.0000  |
| $a_1$     |     |     | 20  | 0.4548 | 0.4849 | 0.3989 | 0.4020 | 0.3989 | 0.0026  |
| $a_2$     |     |     |     | 0.5971 | 0.6309 | 0.5255 | 0.5361 | 0.5255 | 0.0013  |
| ind $a_2$ |     |     |     | 0.1536 | 0.1663 | 0.1305 | 0.1338 | 0.1409 | 0.0003  |
| FWER      |     |     |     | 0.0521 | 0.0000 | 0.0417 | 0.0424 | 0.0417 | 0.0002  |
| $a_1$     |     |     | 10  | 0.7864 | 0.0307 | 0.7546 | 0.7582 | 0.7546 | 0.2329  |
| $a_2$     |     |     |     | 0.9050 | 0.0444 | 0.8800 | 0.8772 | 0.8800 | 0.2531  |
| ind $a_2$ |     | 4   |     | 0.3027 | 0.0090 | 0.2820 | 0.2818 | 0.2983 | 0.0551  |
| FWER      |     |     |     | 0.0509 | 0.0000 | 0.0377 | 0.0383 | 0.0377 | 0.0000  |
| $a_1$     |     |     | 20  | 0.7214 | 0.0158 | 0.6739 | 0.6769 | 0.6739 | 0.0178  |
| $a_2$     |     |     |     | 0.8460 | 0.0148 | 0.7998 | 0.7976 | 0.7998 | 0.0132  |
| ind $a_2$ |     | 0.5 |     | 0.2580 | 0.0030 | 0.2306 | 0.2322 | 0.2428 | 0.0027  |
| FWER      |     |     |     | 0.0521 | 0.0000 | 0.0417 | 0.0424 | 0.0417 | 0.0002  |
| $a_1$     |     |     | 10  | 0.7864 | 0.0307 | 0.7546 | 0.7582 | 0.7546 | 0.2329  |
| $a_2$     |     |     |     | 0.9141 | 0.0407 | 0.8800 | 0.8855 | 0.8800 | 0.2518  |
| ind $a_2$ |     | 10  |     | 0.3065 | 0.0083 | 0.2820 | 0.2852 | 0.2983 | 0.0549  |
| FWER      |     |     |     | 0.0509 | 0.0000 | 0.0378 | 0.0384 | 0.0378 | 0.0000  |
| a         |     |     | 20  | 0.7202 | 0.0161 | 0.6731 | 0.6760 | 0.6731 | 0.0178  |
| $a_2$     |     |     |     | 0.8460 | 0.0148 | 0.7998 | 0.7976 | 0.7998 | 0.0132  |
| ind $a_2$ |     |     |     | 0.2580 | 0.0030 | 0.2306 | 0.2322 | 0.2428 | 0.0027  |

where  $V_i = \text{diag}(\mu_{i1}^2, \dots, \mu_{im}^2)/v$ , and

$$\begin{aligned}
 H(\beta) &= n^{-1} \sum_{i=1}^n \left( \frac{\partial \mu_i}{\partial \beta} \right)^T V_i^{-1} \left( \frac{\partial \mu_i}{\partial \beta} \right), \\
 J(\beta) &= n^{-1} \sum_{i=1}^n \left( \frac{\partial \mu_i}{\partial \beta} \right)^T V_i^{-1} \text{cov}(y_i) V_i^{-1} \left( \frac{\partial \mu_i}{\partial \beta} \right).
 \end{aligned}$$

Table 5: Simulations results of all pairwise comparisons for three multivariate distributions

| model      |      | $\rho$ | MNQ    | naive  | Bonf   | S-D    | Scheffé | Tukey  |
|------------|------|--------|--------|--------|--------|--------|---------|--------|
| normal     | FWER |        | 0.0537 | 0.0562 | 0.0411 | 0.0420 | 0.0038  | 0.0536 |
|            | a1   | 0      | 0.9274 | 0.9266 | 0.9096 | 0.9113 | 0.6115  | 0.9256 |
|            | a2   |        | 0.9800 | 0.9807 | 0.9735 | 0.9740 | 0.8173  | 0.9792 |
|            | FWER |        | 0.0484 | 0.1101 | 0.0358 | 0.0365 | 0.0032  | 0.0489 |
|            | a1   | 0.5    | 0.8611 | 0.9245 | 0.8325 | 0.8346 | 0.4769  | 0.8587 |
|            | a2   |        | 0.9492 | 0.9775 | 0.9346 | 0.9361 | 0.6854  | 0.9482 |
| probit     | FWER |        | 0.0534 | 0.0494 | 0.0409 | 0.0412 | 0.0026  | 0.0524 |
|            | a1   | 0      | 0.9792 | 0.9790 | 0.9745 | 0.9747 | 0.7972  | 0.9791 |
|            | a2   |        | 0.9961 | 0.9961 | 0.9946 | 0.9946 | 0.9321  | 0.9959 |
|            | FWER |        | 0.0523 | 0.0864 | 0.0394 | 0.0394 | 0.0023  | 0.0514 |
|            | a1   | 0.5    | 0.9586 | 0.9754 | 0.9467 | 0.9484 | 0.6991  | 0.9577 |
|            | a2   |        | 0.9885 | 0.9938 | 0.9842 | 0.9848 | 0.8707  | 0.9884 |
| quad. exp. | FWER |        | 0.0534 | 0.0631 | 0.0399 | 0.0407 | 0.0018  | 0.0530 |
|            | a1   | 0      | 0.7710 | 0.7869 | 0.7270 | 0.7301 | 0.3224  | 0.7678 |
|            | a2   |        | 0.9706 | 0.9741 | 0.9613 | 0.9621 | 0.7348  | 0.9701 |
|            | FWER |        | 0.0548 | 0.0000 | 0.0388 | 0.0393 | 0.0014  | 0.0535 |
|            | a1   | 0.5    | 0.9360 | 0.0197 | 0.9199 | 0.9213 | 0.6417  | 0.9356 |
|            | a2   |        | 0.9976 | 0.2855 | 0.9957 | 0.9958 | 0.9408  | 0.9974 |

The dispersion parameter is  $\frac{1}{v} = \frac{D(6(n-p)+nD)}{6(n-p)+2nD}$ , where

$$D = \frac{2}{nm - p} \sum_{i,j} \left( \frac{y_{ij} - \mu_{ij}}{\mu_{ij}} + \log \frac{\mu_{ij}}{y_{ij}} \right).$$

Let  $\hat{V}_{in}$  denote the estimator of  $V_i$  obtained by substituting  $\hat{\mu}_{ijn}$  for  $\mu_{ij}$ . We estimate  $H(\beta)$  and  $J(\beta)$  as

$$\begin{aligned} \hat{H}_n &= n^{-1} \sum_{i=1}^n X_i^T V_{in}^{-1} X_i, \\ \hat{J}_n &= n^{-1} \sum_{i=1}^n X_i^T V_{in}^{-1} \widehat{\text{cov}}_n(y_i) V_{in}^{-1} X_i, \end{aligned}$$

with empirical variance  $\widehat{\text{cov}}_n(y_i) = (y_i - \hat{\mu}_{in})(y_i - \hat{\mu}_{in})^T$ , where  $\hat{\mu}_i$  is the vector  $\hat{\mu}_i = \exp\{X_i \hat{\beta}_n^c\}$ .

In the simulation  $v = 1$ , and under the global null hypothesis  $H_0$ , the true value of the regression parameters is set to  $\beta = 0.75$ ,

and the power is calculated under two different alternative configurations  $\beta_{a_1}^T = (0.75, 0.75, 0.68, 0.75, \dots, 0.75)$  and  $\beta_{a_2}^T = (0.75, 0.80, 0.68, 0.70, 0.79, 0.69, 0.75, \dots, 0.75)$ . We simulate 10000 data sets with  $m = 3$ , and  $p = 10$ . We perform many-to-one comparisons with the MNQ, naive MNQ, Bonferroni, Dunn-Sidák, Holm and Scheffé method. We consider both independent and correlated cases. We simulate with the sample size  $n = 3000$  as we found that it takes at least  $n = 3000$  for the MNQ method to have the FWER fall within 2 standard deviations away from 0.05. This larger sample size is expected for a skewed distribution such as the multivariate gamma. Among all the methods, the MNQ method continues to achieve the highest power and exhibits the best performance. The results are presented in Table 6.

Table 6: FWER and power for multivariate gamma distribution (many-to-one)

|      |             | MNQ    | naive  | Bonf   | S-D    | Schéffé |
|------|-------------|--------|--------|--------|--------|---------|
| FWER | independent | 0.0554 | 0.0507 | 0.0437 | 0.0444 | 0.0003  |
|      | $a_1$       | 0.8763 | 0.8777 | 0.8508 | 0.8531 | 0.3055  |
|      | $a_2$       | 0.9906 | 0.9899 | 0.9856 | 0.9862 | 0.4526  |
| FWER | correlated  | 0.0588 | 0.3427 | 0.0468 | 0.0479 | 0.0003  |
|      | $a_1$       | 0.8223 | 0.9883 | 0.7853 | 0.7877 | 0.2378  |
|      | $a_2$       | 0.9778 | 0.9999 | 0.9638 | 0.9653 | 0.3683  |

### 3 Some technical details

Xu and Reid (2011) provided a detailed proof of consistency under misspecification, along with a precise list of required conditions. One can obtain from their work sufficient conditions for consistency even in the well-specified setting. Here, for reference, we give a proof of some asymptotic properties of the composite likelihood estimator provided that the model is correctly specified and data is formed by  $n$  independent clusters, each with fixed sample size  $m$ .

**Regularity conditions:**

- (A1). The marginal density function of  $y_{ij}$ ,  $f(y; \theta)$  is distinct for different values of  $y$ , i.e. if  $\theta_1 \neq \theta_2$  then  $P(f(y_{ij}; \theta) \neq f(y_{ij}; \theta)) > 0$ , for all  $j = 1, \dots, m$ .
- (A2). The marginal densities of  $y_{ij}$  have common support for all  $\theta$ .
- (A3). The true value  $\theta_0$  is an interior point of  $\Omega$ , the space of possible values of the parameter  $\theta$ .
- (A4). Let  $\alpha$  and  $\partial^\alpha$  denote the index and partial derivative operator, respectively, as in the standard multi-index notation from multi-variable calculus. The marginal density  $\log f$  is three times continuously differentiable in a closed ball around  $\theta_0$ . Moreover, there exists a constant  $c$  and an integrable function  $M(y)$  such that
$$\left| (\partial^\alpha \partial^{\theta_i} \log f)(y; \theta) \right| \leq M(y),$$
for all  $\|\theta - \theta_0\|_2 < c$ , all  $|\alpha| = 2$ , and any  $i = 1, \dots, p$ . Here,  $\|\cdot\|_2$  denotes the Euclidean norm.
- (A5).  $J(\theta_0)$  is well-defined (i.e. exists and is finite) and invertible.
- (A6).  $H(\theta_0)$  is well-defined (i.e. exists and is finite) and (strictly) positive-definite.

Define the marginal composite log-likelihood function as

$$cl(\theta) = \log CL(\theta; Y) = \sum_{i=1}^n \sum_{j=1}^m \log f(y_{ij}; \theta),$$

and let  $cl_m(\theta; y_i) = \sum_{j=1}^m \log f(y_{ij}; \theta)$ .

**Theorem 3.1.** *Under the regularity conditions (A1)-(A6), there exists a solution to the composite likelihood equation,  $\hat{\theta}_n^c$ , which satisfies*

$$\sqrt{n}(\hat{\theta}_n^c - \theta_0) \Rightarrow G^{-1/2}(\theta_0) Z$$

where  $G(\theta) = H(\theta)J^{-1}(\theta)H(\theta)$ , and  $Z$  is a standard normal random vector.



*Proof.* The proof is divided into two main steps. We first show that there exists a  $\widehat{\theta}_n^c$  which is of order  $O(n^{-1/2})$ , and then we derive its asymptotic normality.

Let  $h(\theta; y) = cl(\theta; y)$ . Note that for fixed  $y$ ,  $h$  maps  $\mathbb{R}^p$  into  $\mathbb{R}$ . Then, by a Taylor expansion, we have that

$$h(\theta; y) - h(\theta_0; y) = (\nabla h)(\theta_0; y)^T (\theta - \theta_0) + (\theta - \theta_0)^T (Dh)(\theta^*; y) (\theta - \theta_0),$$

where  $\theta^*$  lies on a line joining  $\theta$  and  $\theta_0$ . We use  $\nabla, D$  to denote the gradient and Hessian operators, respectively. Our goal will be to show that there exists a  $\theta$  in a  $n^{-1/2}$  ball of  $\theta_0$ , the left hand side of the above equation is negative. This in turn will imply that there exists a CMLE which satisfies  $\sqrt{n}(\widehat{\theta}_n^c - \theta_0) = O_p(1)$ .

To this end, let  $\theta - \theta_0 = \xi M / \sqrt{n}$ , with  $\|\xi\|_2 = 1$ . Assume also that  $\|\theta - \theta_0\|_2 < c$ , that is,  $M < c\sqrt{n}$ . Then, by the above, we have

$$\begin{aligned} & \xi^T \left\{ \frac{1}{\sqrt{n}} \sum_{i=1}^n (\nabla cl_m)(\theta_0, y_i) \right\} + \xi^T \left\{ \frac{1}{n} \sum_{i=1}^n (Hcl_m)(\theta^*, y_i) \right\} \xi \\ & \equiv \xi^T b_n M + \xi^T B_n \xi M^2, \end{aligned} \quad (3.1)$$

where  $b_n$  is a random vector converging to a mean-zero Gaussian RV, and  $B_n$  is the random matrix converging to the negative definite matrix  $-H(\theta_0)$ . The first of these follows by the central limit theorem, along with assumption (A5). The second follows by applying the law of large numbers, along with assumptions (A4) and (A6). Note that the second fact implies also that the eigenvalues of  $B_n$  converge almost surely to the eigenvalues of  $-H(\theta_0)$ .

Let  $\lambda_n^{(p)}$  denote the largest eigenvalue of  $-B_n$ , and let  $S = \{\xi : \|\xi\|_2 = 1\}$ . Since  $b_n$  converges as a random Gaussian vector (with mean zero), and  $\xi^T b_n$  is uniformly continuous on  $S$ , it follows that  $\xi^T b_n$  converges to a mean-zero Gaussian process in  $C(S)$ , the space of continuous functions on  $S$  endowed with the uniform metric. This

implies that  $\xi^T b_n$  is tight in  $C(S)$ , and hence for all  $\varepsilon > 0$ , there exists an  $M_\varepsilon$ , such that

$$\limsup_n P \left( \sup_{\xi \in S} \xi^T b_n / \lambda_n^{(p)} < M_\varepsilon \right) \geq 1 - \varepsilon.$$

Then, by (3.1), if  $\xi^T b_n / \lambda_n^{(p)} < M$ , then  $\xi^T b_n M + \xi^T B_n \xi M^2 < 0$ , which in turn implies that

$$\limsup_n P \left( \xi^T b_n M_\varepsilon + \xi^T B_n \xi M_\varepsilon^2 < 0 \quad \forall \xi \in S \right) \geq 1 - \varepsilon.$$

Note that if  $\xi^T b_n M_\varepsilon + \xi^T B_n \xi M_\varepsilon^2 < 0 \quad \forall \xi \in S$ , then, by the above and continuity of  $cl_m$ , this implies that for sufficiently large  $n$ , (with a probability of at least  $1 - \varepsilon$ ) there exists at least one local maximum on the set  $B_{M_\varepsilon/\sqrt{n}}(\theta_0) \cap B_c(\theta_0)$ . This implies that there exists a  $\hat{\theta}_n^c$  which satisfies  $\sqrt{n}(\hat{\theta}_n^c - \theta_0) = O_p(1)$ .

Let  $g(\theta; y) = cl_m^{(1)}(\theta; y) = \nabla cl_m(\theta; y)$  (this is the vector of first derivatives), then using a multivariate Taylor expansion, we have that

$$\begin{aligned} g(\hat{\theta}_n^c; y) &= g(\theta_0; y) + \sum_{|\alpha| \leq 1} (\partial^\alpha g)(\theta_0; y) (\hat{\theta}_n^c - \theta_0)^\alpha \\ &\quad + \sum_{|\alpha|=2} \frac{2}{\alpha!} (\hat{\theta}_n^c - \theta_0)^\alpha \int_0^1 (1-t) (\partial^\alpha g)(\theta_0 + t(\hat{\theta}_n^c - \theta_0); y) dt, \end{aligned}$$

again using the multi-index notation. We take  $\hat{\theta}_n^c$  to be the local maximizer found above. This time, for fixed  $y$ ,  $g$  maps  $\mathbb{R}^p$  into  $\mathbb{R}^p$ , so we have chosen to bound the error term a little differently than above. We let  $R_{n,i}$  denote the third term on the right hand side of this equation when  $y$  is replaced with  $y_i$ . Next, as by definition  $\sum_{i=1}^n cl_m^{(1)}(\hat{\theta}_n^c; y_i) = 0$ , we have that

$$\frac{1}{\sqrt{n}} \sum_{i=1}^n (Dcl_m)(\theta; y_i)^T (\hat{\theta}_n^c - \theta_0) + \frac{1}{\sqrt{n}} \sum_{i=1}^n R_{n,i} = \frac{1}{\sqrt{n}} \sum_{i=1}^n f(\theta_0; y_i). \quad (3.2)$$

By condition (A4), we have that

$$\begin{aligned} & \left| \sum_{|\alpha|=2} \frac{2}{\alpha!} (\hat{\theta}_n^c - \theta_0)^\alpha \int_0^1 (1-t) (D^\alpha g)(\theta_0 + t(\hat{\theta}_n^c - \theta_0); y) dt \right| \\ & \leq \sum_{|\alpha|=2} \frac{1}{\alpha!} |\hat{\theta}_n^c - \theta_0|^\alpha |M(y)|, \end{aligned}$$

from which it follows that,

$$\left| \frac{1}{\sqrt{n}} \sum_{i=1}^n R_{n,i} \right| \leq \left\{ \sqrt{n} \|\hat{\theta}_n^c - \theta_0\|_2^2 \right\} \left\{ \frac{1}{n} \sum_{i=1}^n |M(y_i)| \right\}.$$

The first term is then  $o_p(1)$  by the first part of this proof, and by the law of large numbers (since  $M$  is integrable), the second term is  $O_p(1)$ . Next, consider

$$\sqrt{n} \left\{ \frac{1}{n} \sum_{i=1}^n cl_m^{(2)}(\theta; y_i) - H(\theta_0) \right\} (\hat{\theta}_n^c - \theta_0).$$

By similar argument to that above, this is also  $o_p(1)$ . This allows us to re-write (3.2) as

$$\sqrt{n} H(\theta_0) (\hat{\theta}_n^c - \theta_0) = \frac{1}{\sqrt{n}} \sum_{i=1}^n f(\theta_0; y_i) + o_p(1)$$

A straightforward application of the central limit theorem shows that the term on the right hand side has a Gaussian limiting distribution with mean zero and variance  $J(\theta_0)$ . The full result follows.  $\square$

## References

Ronning, G.(1977). A simple scheme for generating multivariate gamma distributions with non-negative covariance matrix. *Technometrics* **19**, 179–183.
